# Supplementary material for: MiRNA-Responsive CRISPR-Cas System via a DNA Regulator
Source: MDPI journal article supplement (doi:10.3390/bios13110975), 2023-11-07
Supplement: s1 [file s1]

**Supporting Information for**

# **MiRNA-responsive CRISPR-Cas system via a DNA regulator**

**Da young Yun, Cheulhee Jung \***

\*Corresponding Author: Cheulhee Jung

Email: damo363@korea.ac.kr

This file includes:

Supplementary Figure S1: Confirmation of inhibitory effect by single strand DNA regulator.

Supplementary Figure S2: Validation of miRNA-response of the DNA regulator.

Supplementary Table S1: Summary of oligonucleotides sequence.

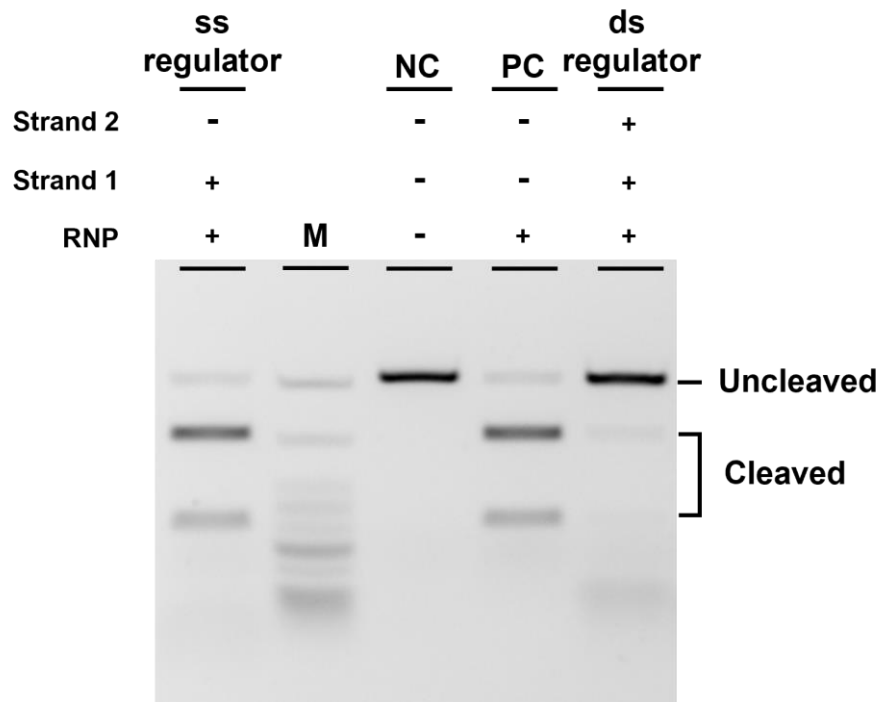

**Figure S1.** Confirmation of inhibitory effect by single strand DNA regulator. In vitro cleavage assay result to prove the effect of single strand(ss) regulator. ss regulator has similar cleavage efficiency with PC. It means that the single strand regulator cannot inhibit the RNP activity. M; Marker.

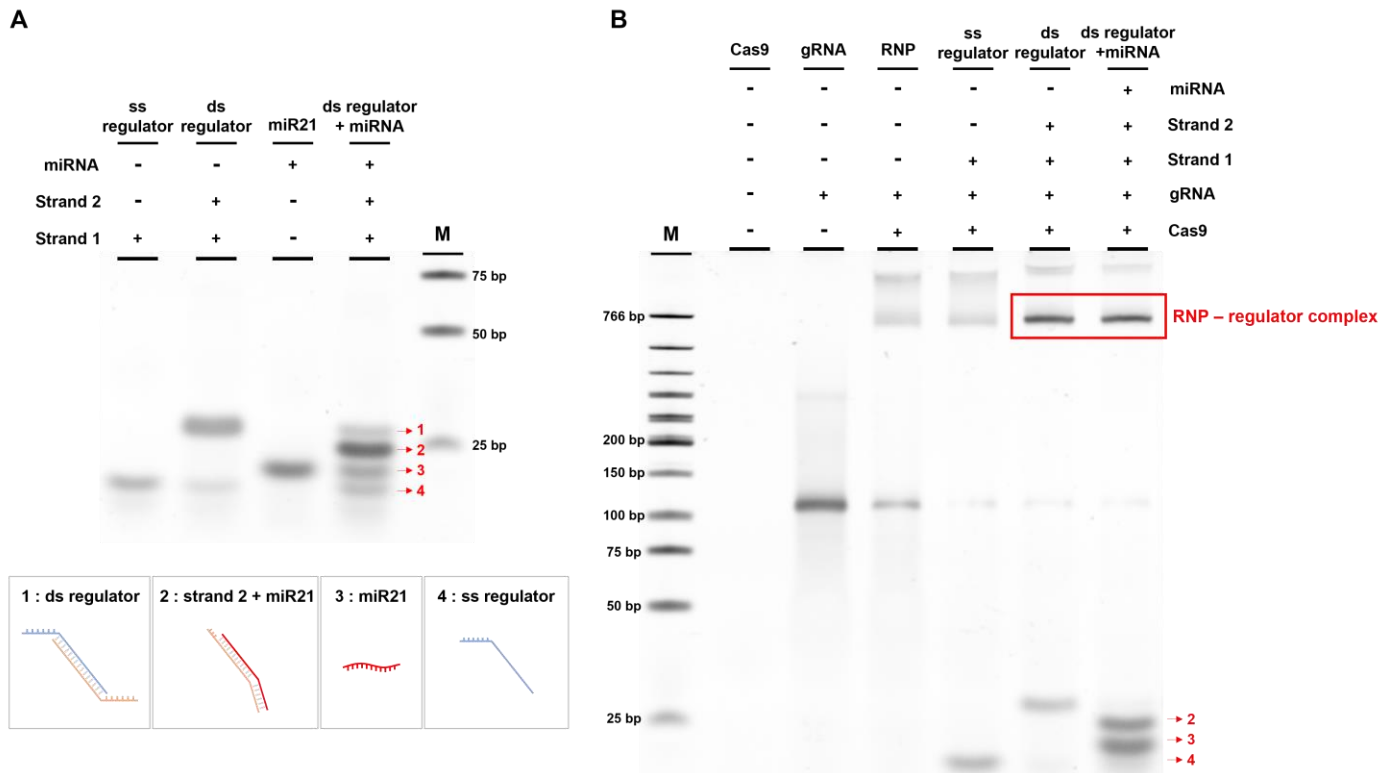

**Figure S2.** Validation of miRNA-response of the DNA regulator using native PAGE gel. **(A)** Identification of toehold displacement of the DNA regulator by miR21. When miR21 is present, it binds with TH of strand 2 and then strand displacement occurs along the stem. Eventually, the newly appeared strand 2 + miR21 band emerged. This result means that the regulator structure was successfully disrupted by miR21. **(B)** EMSA assay result for the RNP-regulator complex. The RNP-regulator complex is formed only when the double strand regulator is present. Also, the strand 2 + miR21 band indicates that the regulator can be released from the complex when miR21 is added. M; Marker

**Table S1.** Summary of oligonucleotides sequence

LNA modification is indicated by +.

| <b>sgRNA and primer</b>     |                                |
|-----------------------------|--------------------------------|
| EMX1 sgRNA                  | GAGTCCGAGCAGAAGAAGAA           |
| EMX1 Forward primer         | GGGTCATAGGCTCTCTCATTTAC        |
| EMX1 Reverse primer         | CCATTGCTTGTCCCTCTGT            |
| <b>miR21 related oligo</b>  |                                |
| miRNA21                     | UAGCUUAUCAGACUGAUGUUGA         |
| miR21_1-1_S4_TH6            | ATCAGACTGATGTTGA TCG TTCT      |
| miR21_1-1_S5_TH6            | ATCAGACTGATGTTGA TCG TTCTT     |
| miR21_1-1_S6_TH6            | ATCAGACTGATGTTGA TCG TTCTTC    |
| miR21_1-1_S6_TH8            | CAGACTGATGTTGA TCG TTCTTC      |
| miR21_1-1_S6_TH10           | GACTGATGTTGA TCG TTCTTC        |
| miR21_1-1_S8_TH6            | ATCAGACTGATGTTGA TCG TTCTTCTT  |
| miR21_1-1_S8_TH10           | GACTGATGTTGA TCG TTCTTCTT      |
| miR21_1-2                   | CGG TCAACATCAGTCTGATAAGCTA     |
| miR21_1-2_TH LNA            | CGG TCAACATCAGTCT+GAT+AAG+CTA  |
| <b>let 7a related oligo</b> |                                |
| let 7a                      | UGAGGUAGUAGGUUGUAUAGUU         |
| let 7a_1-1_S6_TH6           | AGTAGGTTGTATAGTT TCG TTCTTC    |
| let 7a_1-1_S6_TH8           | TAGGTTGTATAGTT TCG TTCTTC      |
| let 7a_1-1_S6_TH10          | GGTTGTATAGTT TCG TTCTTC        |
| let 7a_1-2_TH LNA           | CGG AACTATAACAACCT+ACT+ACC+TCA |
| <b>miR221 related oligo</b> |                                |
| miR221                      | AGCUACAUUGUCUGCUGGGUUC         |
| miR221_1-1_S6_TH6           | ATTGTCTGCTGGGTTT TCG TTCTTC    |
| miR221_1-1_S6_TH8           | TGTCTGCTGGGTTT TCG TTCTTC      |
| miR221_1-1_S6_TH10          | TCTGCTGGGTTT TCG TTCTTC        |
| miR221_1-2_TH LNA           | CGG AAACCCAGCAGAC+AAT+GTA+GCT  |

| miR155 related oligo |                               |
|----------------------|-------------------------------|
| miR155               | UUAAUGCUAAUCGUGAUAGGGGUU      |
| miR155_1-1_S6_TH6    | CTAATCGTGATAGGGG TCG TTCTTC   |
| miR155_1-1_S6_TH8    | AATCGTGATAGGGG TCG TTCTTC     |
| miR155_1-1_S6_TH10   | TCGTGATAGGGG TCG TTCTTC       |
| miR155_1-2_TH LNA    | CGG CCCCTATCACGAT+TAG+CAT+TAA |
